# Supplementary material for: Difference in respiratory syncytial virus-specific Fc-mediated antibody effector functions between children and adults
Source: PubMed Central journal article supplement (PMC10711356; doi:10.1093/cei/uxad101), 2023-08-22
Supplement: uxad101_suppl_supplementary_figures.pdf [file uxad101_suppl_supplementary_figures.pdf]

# Supplementary figure 1

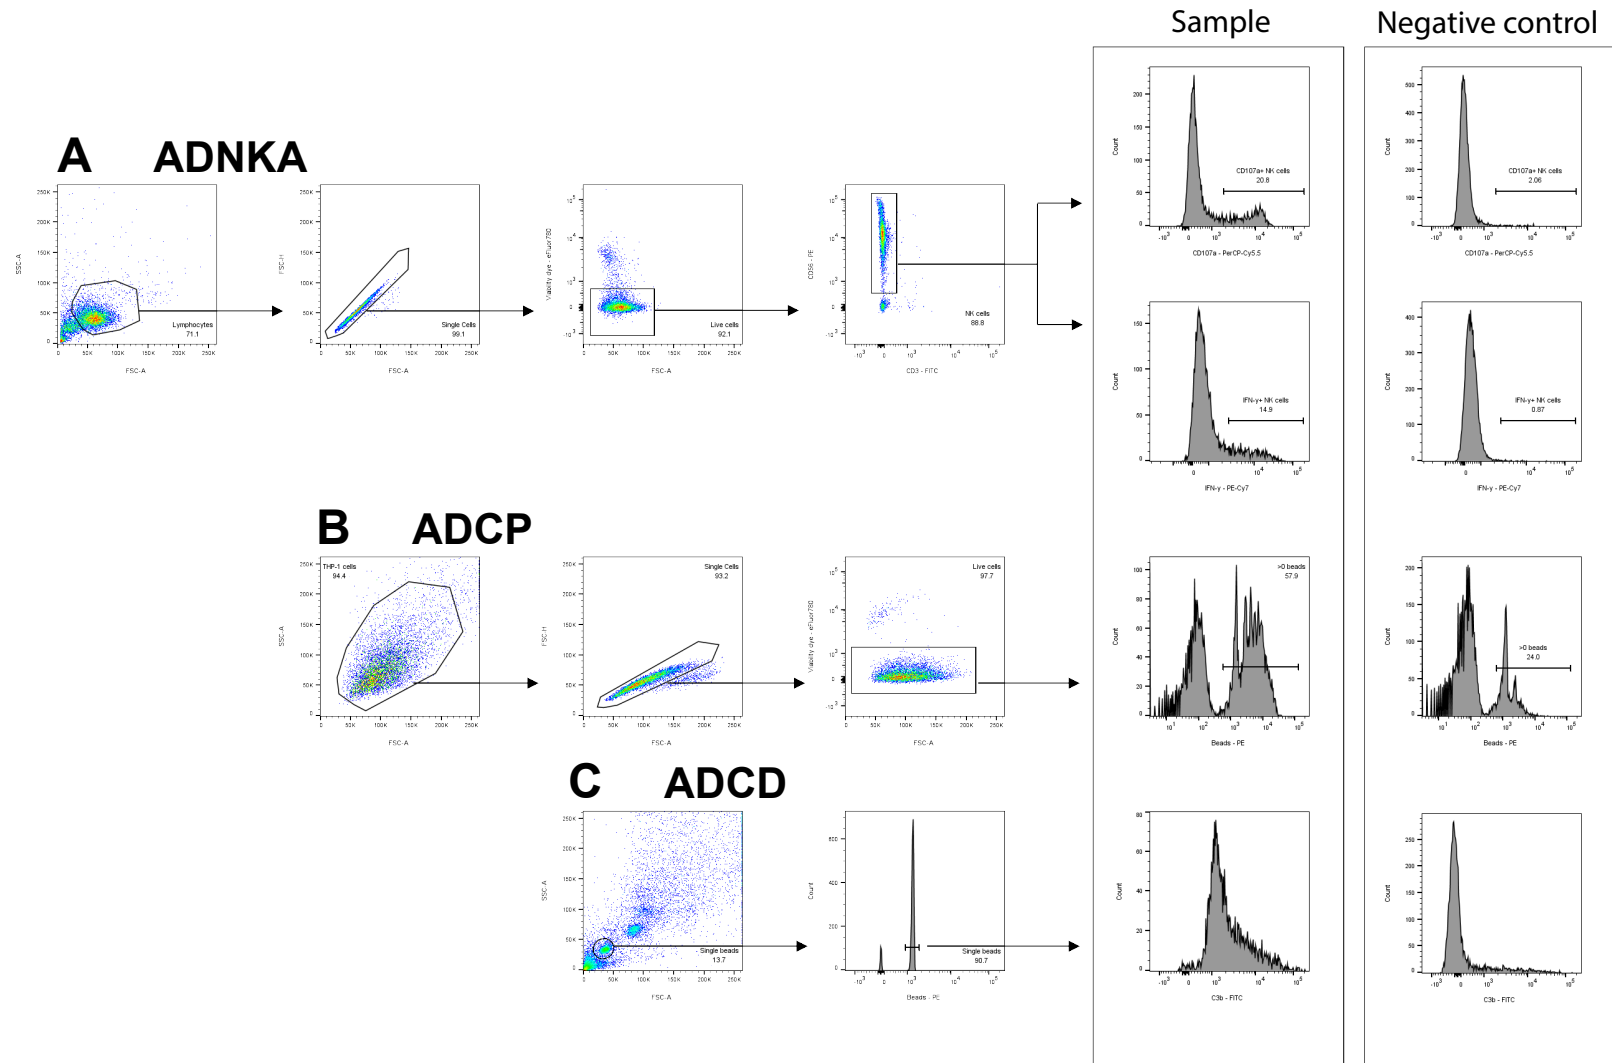

**Supplementary figure S1. Gating strategy Fc-mediated antibody effector assays. (A)** Gating strategy ADNKA. CD3-CD56<sup>+</sup> NK cells were gated from the single, live cells gate. CD107a<sup>+</sup> or IFN-γ<sup>+</sup> NK-cells were subsequently gated. **(B)** Gating strategy ADCP. THP-1 cells were gated on forward and sideward scatter. Cells that have taken up one bead or more are selected from the single, live cells gate. **(C)** Gating strategy ADCD. Single beads were selected and geometric mean fluorescence of C3b-FITC was assessed. Dot plots and histograms are depicted for one representative sample. ADNKA, antibody-dependent NK cell activation; ADCP, antibody-dependent cellular phagocytosis; ADCD, antibody-dependent complement deposition; NK cells, natural killer cells.

# Supplementary figure 2

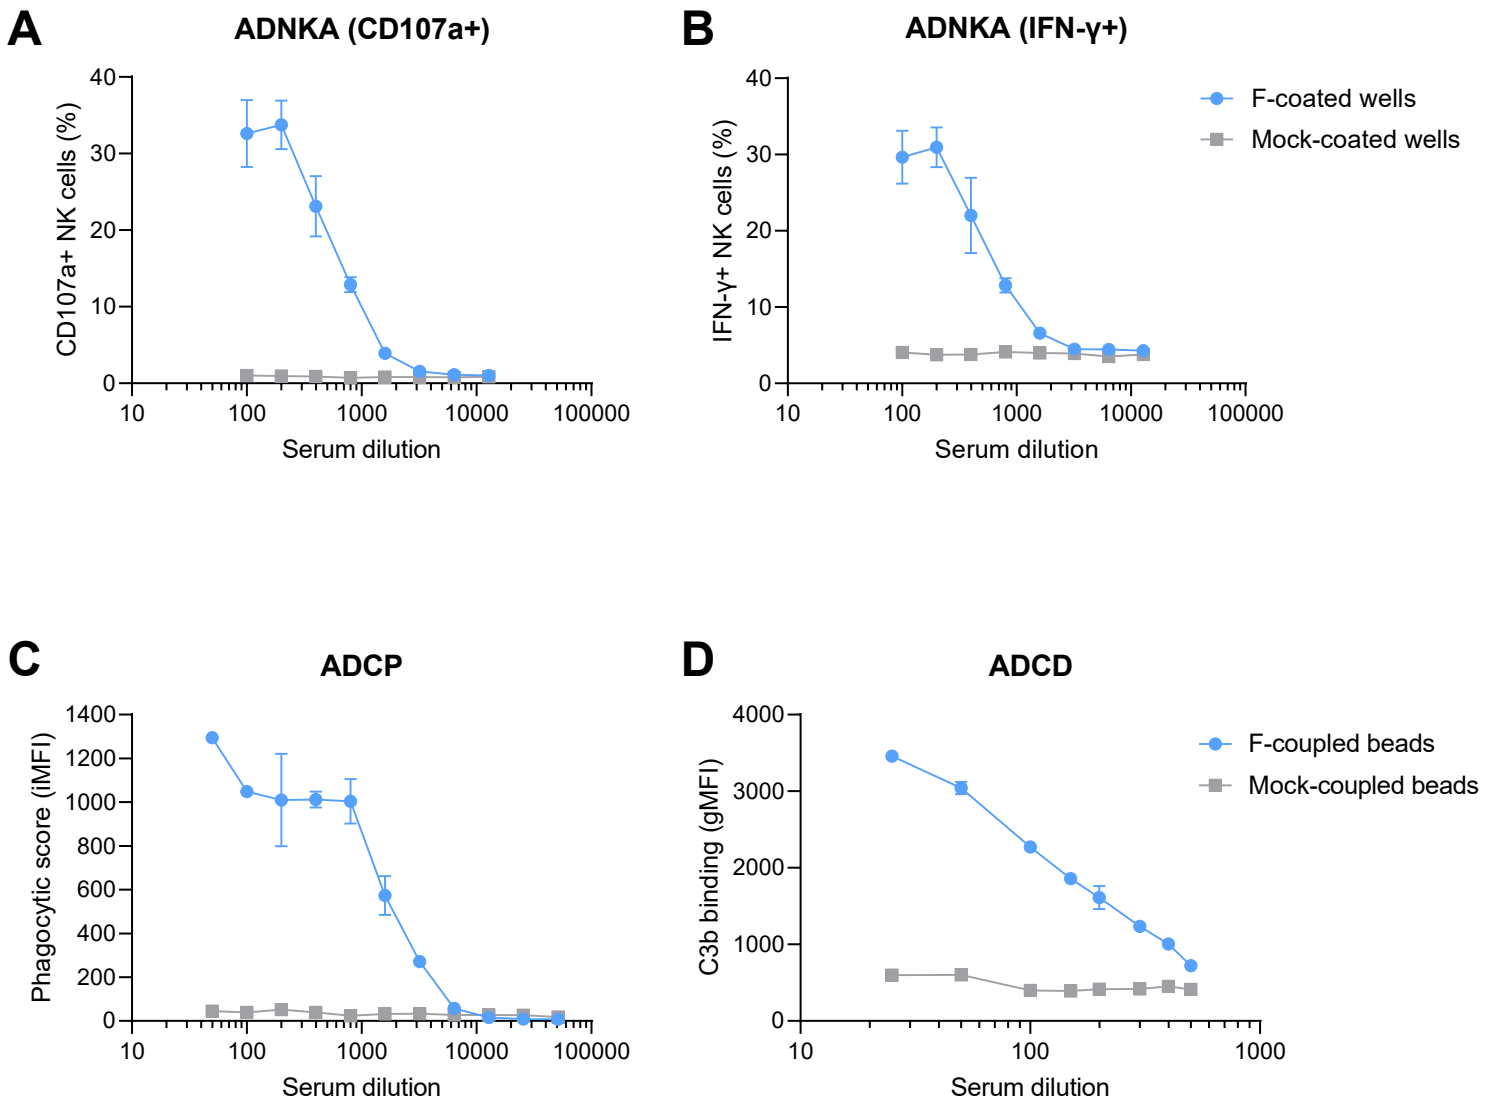

**Supplementary figure S2. Serum titration curves for optimization of ADNKA, ADCP, and ADCD assays.** Serum of 3 healthy adult donors was pooled and titrated to determine the optimal serum dilution for each assay. (A) ADNKA with percentage of CD107a+ NK cells as read-out. (B) ADNKA with percentage of IFN- $\gamma$ + NK cells as read-out. (C) ADCP by THP-1 cells with phagocytic score as read-out. (D) ADCD with gMFI as read-out. All data points represent means of technical duplicates with standard deviation. ADCD, antibody-dependent complement deposition; ADCP, antibody-dependent cellular phagocytosis; ADNKA, antibody-dependent NK cell activation; gMFI, geometric mean fluorescence intensity; iMFI, integrated mean fluorescence intensity; NK cells, natural killer cells.

# Supplementary figure 3

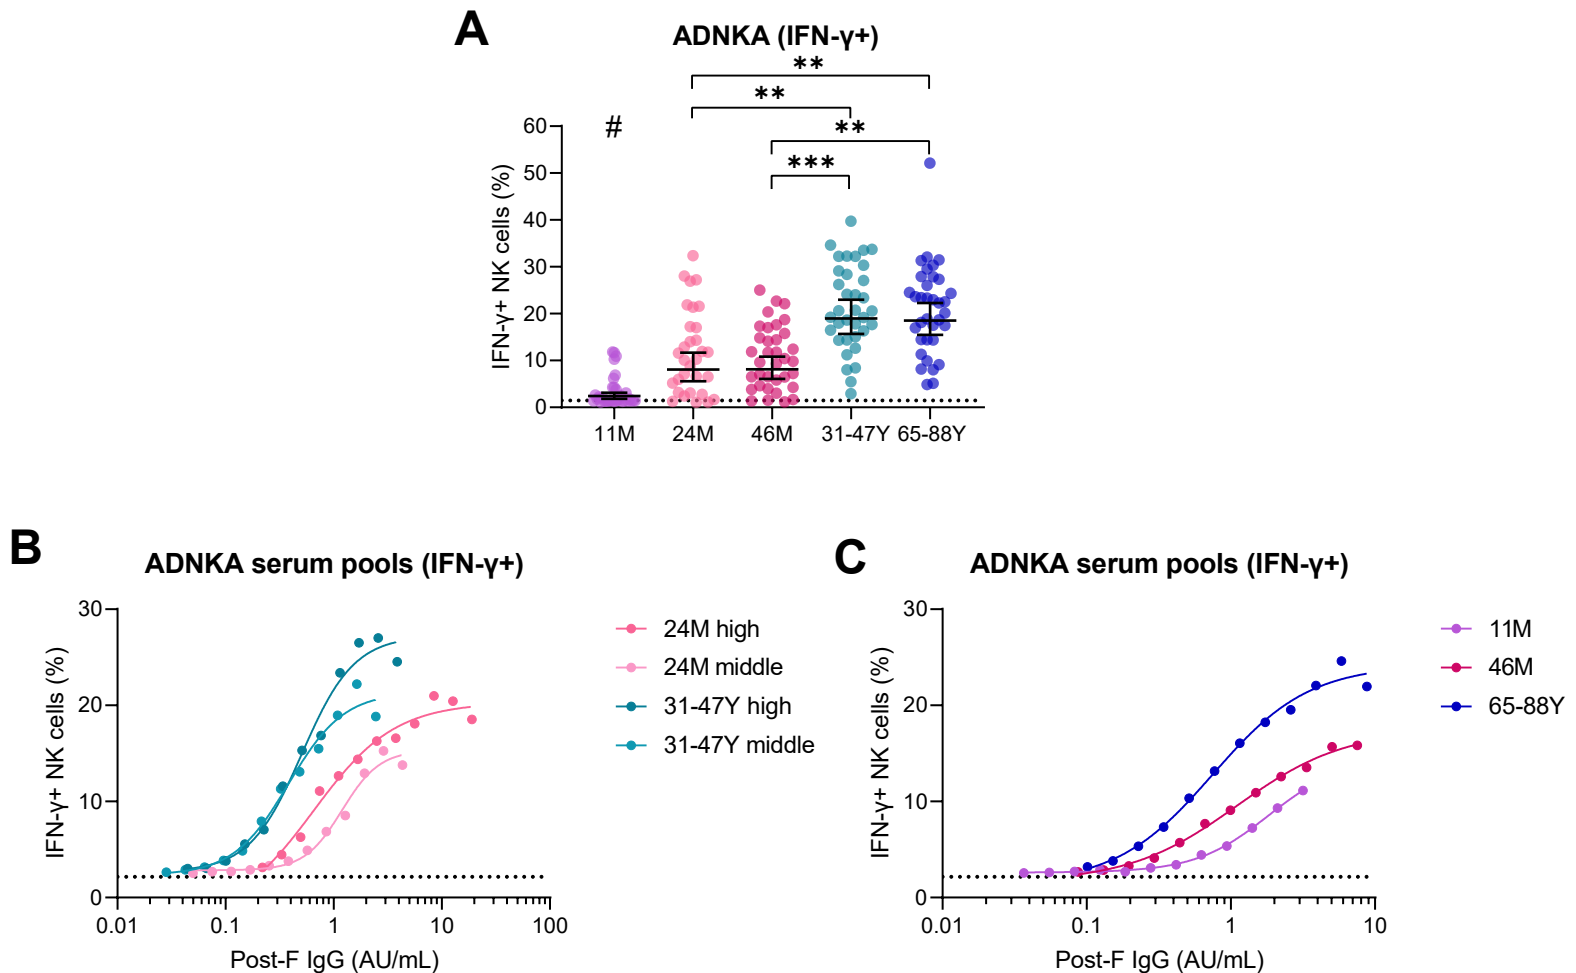

**Supplementary figure S3. ADNKA with IFN- $\gamma$ + NK cells as read-out.** (A) ADNKA with percentage of IFN- $\gamma$ + NK cells as read-out in different age groups: 11-months (n=33), 24-months (n=31), 46-months (n=35), adults (n=35), older adults (n=35). All data points represent individual participants measured using NK cells from 3 healthy adult donors, and geometric means with 95% confidence intervals are depicted. Data is analyzed by Kruskal-Wallis test. # indicates statistical significance of at least P<0.01 compared to all other age groups. (B-C) Serum pools were prepared from the 10 individuals with the highest post-F-specific IgG concentration for each age group (“high”) as well as pools of the 10 (adults) or 8 (24M) individuals with post-F-specific IgG levels around the GMC (“middle”). Post-F-specific IgG levels for each pool were measured with a multiplex immunoassay and ADNKA was assessed on a serial dilution range of each pool. (B) Graph shows ADNKA titration of 24-month-old “high” (pink), 24-month-old “middle” (light pink), adults “high” (teal), and adults “middle” (light teal) serum pools, with percentage of IFN- $\gamma$ + NK cells as read-out. (C) ADNKA titration of 11-month-old “high” (purple), 46-month-old “high” (dark pink), and older adults “high” (blue) serum pools, with percentage of IFN- $\gamma$ + NK cells as read-out. The average of three healthy NK cell donors is depicted. The curves are fitted based on a 4-parameter nonlinear regression model. The dotted lines indicate the level of the negative control. ADNKA, antibody-dependent NK cell activation; AU/mL, arbitrary units per milliliter; GMC, geometric mean concentration; NK cells, natural killer cells.

# Supplementary figure 4

## A

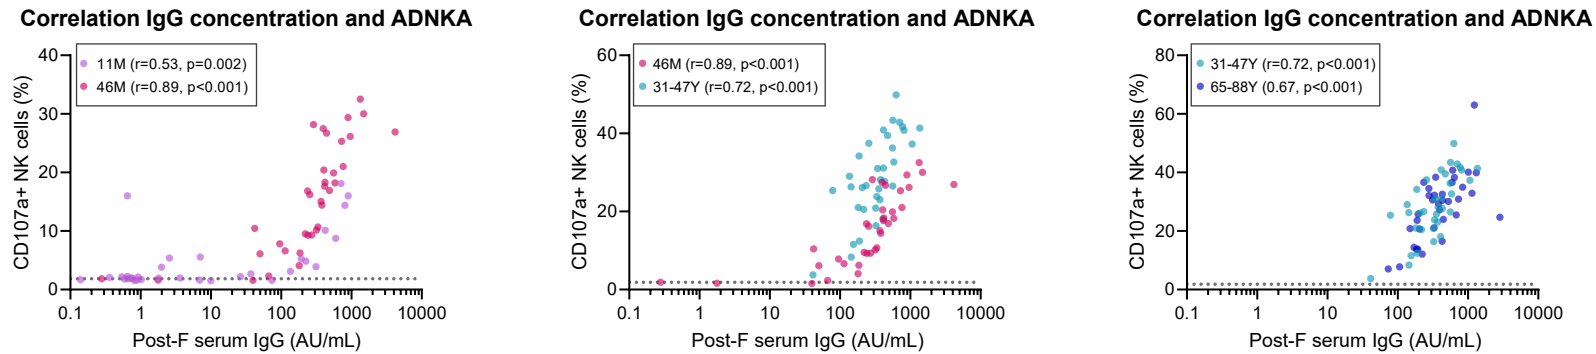

## B

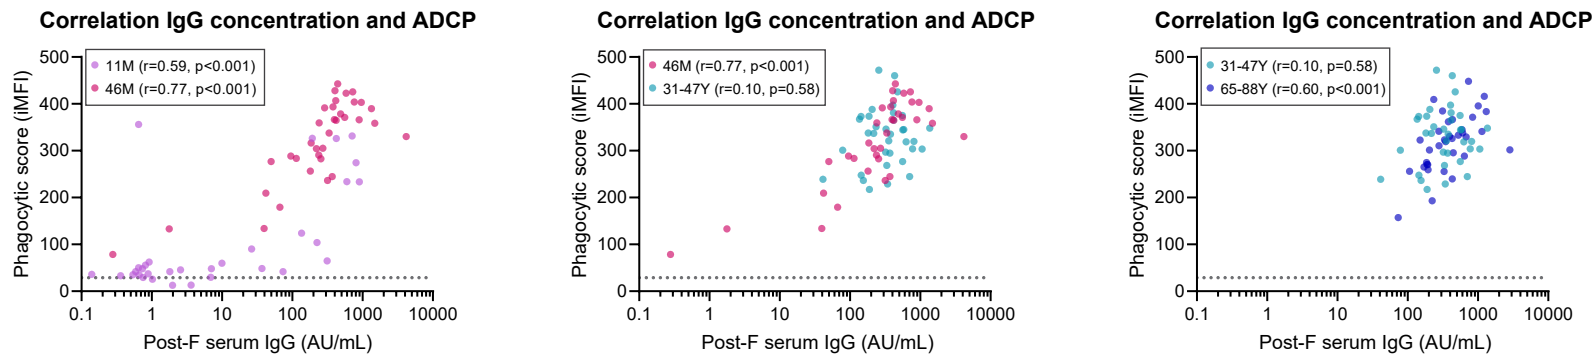

## C

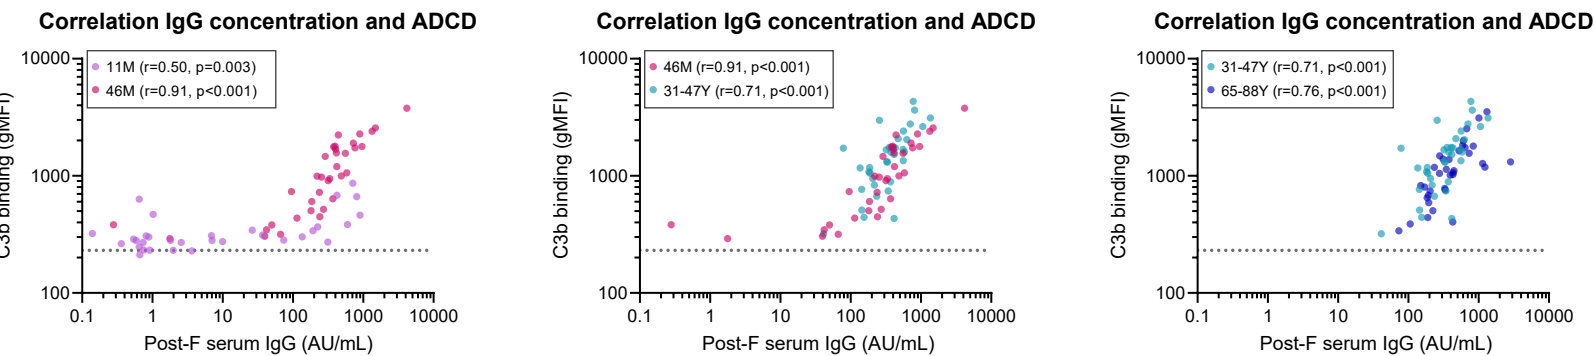

**Supplementary figure S4. Correlation between post-F serum IgG and ADNKA, ADCP, and ADCD for different age groups.** Post-F-specific serum IgG levels and ADNKA, ADCP, and ADCD were determined for 11-month-old (purple,  $n=33$ ) and 46-month-old children (pink,  $n=35$ ), adults (teal,  $n=35$ ), and older adults (blue,  $n=35$ ). Correlations are shown between post-F-specific serum IgG levels and (A) ADNKA measured as percentage CD107a+ NK cells, (B) ADCP by THP-1 cells with phagocytic score as read-out, and (C) ADCD with geometric mean fluorescence intensity as read-out. Dotted lines indicate negative control (ADNKA, ADCP, ADCD). All data points represent individual participants. Correlations are assessed using the Spearman method. ADCD, antibody-dependent complement deposition; ADCP, antibody-dependent cellular phagocytosis; ADNKA, antibody-dependent natural killer cell activation; AU/mL, arbitrary units per milliliter; gMFI, geometric mean fluorescence intensity; iMFI, integrated mean fluorescence intensity; NK cells, natural killer cells.

# Supplementary figure 5

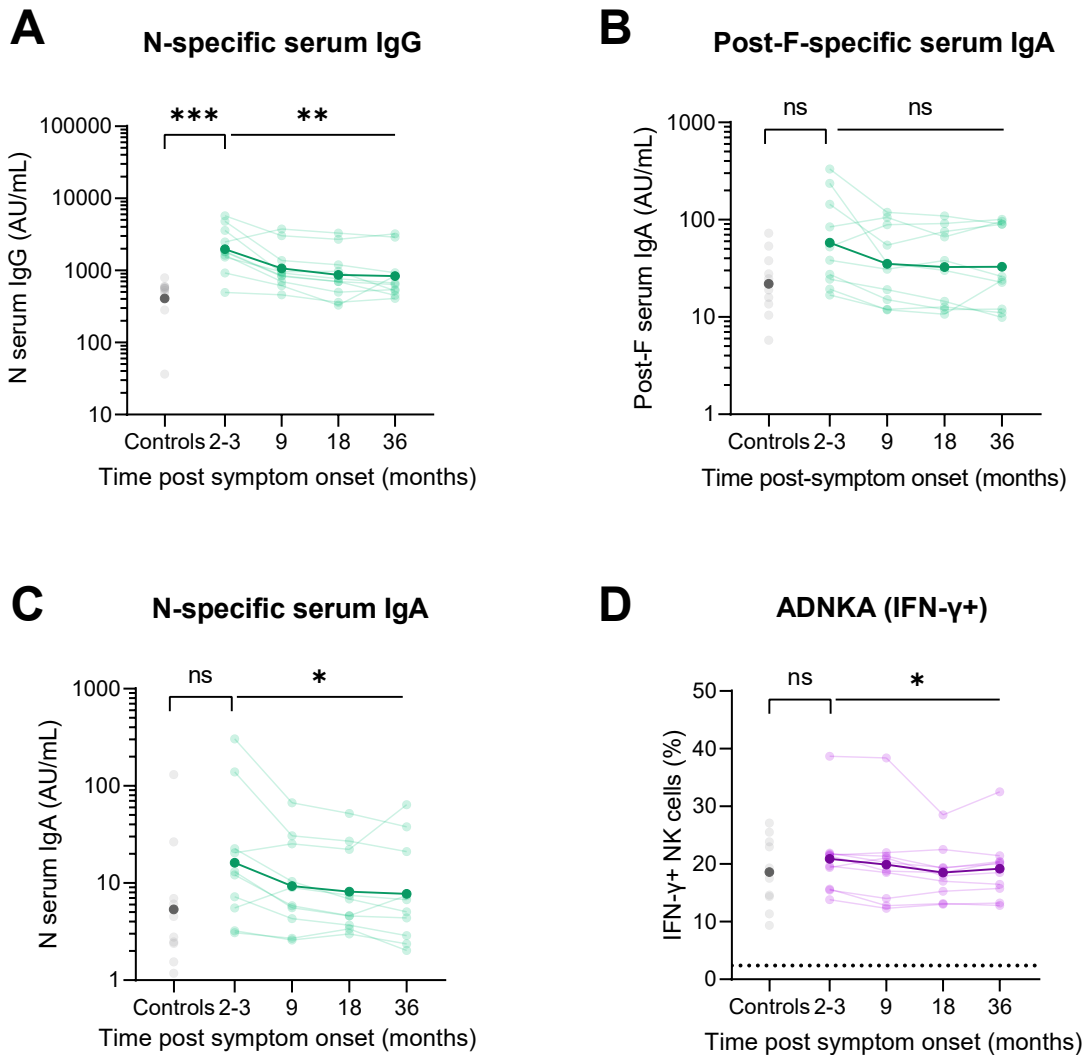

**Supplementary figure S5. Kinetics post RSV infection of N- and post-F-specific serum IgG and IgA, and ADNKA with IFN- $\gamma$ + NK cells as read-out.** (A) N-specific serum IgG concentrations, (B) post-F-specific serum IgA concentrations, and (C) N-specific serum IgA concentrations measured with a multiplex immunoassay in controls (n=10) and convalescent individuals followed over time after RSV infection (n=10). (D) ADNKA with percentage of IFN- $\gamma$ + NK cells as read-out in controls and convalescent individuals following RSV infection over time. Averages of three healthy NK cell donors are depicted. Dotted line indicates level of negative control. Each line represents a unique individual, dark lines indicate the geometric mean of all participants. Light grey dots represent individual age-matched controls, dark grey dots represent the geometric mean level of the control samples. Differences between controls and 2-3 months post symptom onset was assessed with a Mann-Whitney test. Differences over the complete follow-up time post infection were assessed with a Friedman test. \*P<0.05; \*\*P<0.01, \*\*\*P<0.001; ns, not significant. ADNKA, antibody-dependent NK cell activation; NK cells, natural killer cells.
